# Supplementary material for: Uveitis and cystoid macular oedema secondary to topical prostaglandin analogue use in ocular hypertension and open angle glaucoma
Source: PubMed Central journal article supplement — Br J Ophthalmol. 2020 Aug 1;104(8):1040–4. doi: 10.1136/bjophthalmol-2019-315280 (PMC7577108; doi:10.1136/bjophthalmol-2019-315280), 2020-08-01
Supplement: bjophthalmol-2019-315280s001.pdf [file bjophthalmol-2019-315280s001.pdf]

**1 APPENDIX**

2

3 Appendix 1. Search strategy for MEDLINE

4

5 Database: Ovid MEDLINE(R) In-Process & Other Non-Indexed Citations and Ovid  
6 MEDLINE(R) <1946 to Present>

7

8 Search Strategy:

9

- 10 1 Glaucoma, Open-Angle/ (11185)
- 11 2 Hydrophthalmos/ (541)
- 12 3 open angle glaucoma\$.ti,ab. (9118)
- 13 4 compensat\$ glaucoma\$.ti,ab. (6)
- 14 5 (simpl\$ adj1 glaucoma\$).ti,ab. (620)
- 15 6 wide angle glaucoma\$.ti,ab. (24)
- 16 7 hydrophthalm\$.ti,ab. (83)
- 17 8 buphthalm\$.ti,ab. (344)
- 18 9 megophthalm\$.ti,ab. (8)
- 19 10 Ocular Hypertension/ (5556)
- 20 11 ocular hypertensions. Ti,ab. (4058)
- 21 12 intraocular pressure/ (31463)
- 22 13 intraocular pressure. Ti,ab. (25366)
- 23 14 intraocular hypertensions. Ti,ab. (199)
- 24 15 intra ocular hypertension. Ti,ab. (10)
- 25 16 ocular pressure. Ti,ab. (1109)
- 26 17 ocular tension. Ti,ab. (257)
- 27 18 intraocular tension.ti,ab. (182)
- 28 19 (eye\$ adj3 hypertension\$).ti,ab. (349)
- 29 20 (eye\$ adj3 pressure).ti,ab. (1663)
- 30 21 (eye\$ adj3 tension).ti,ab. (249)
- 31 22 or/1-21 (48485)
- 32 23 exp Prostaglandins, Synthetic/ (14043)
- 33 24 (prostaglandin\$ adj3 analog\$).ti,ab. (3103)
- 34 25 pg analog\$.ti,ab. (166)
- 35 26 synthetic prostaglandin\$.ti,ab. (412)
- 36 27 latanoprost.mp. (1665)
- 37 28 bimatoprost.mp. (618)
- 38 29 travoprost.mp. (580)
- 39 30 tafluprost.mp. (142)
- 40 31 latisse.mp. (10)
- 41 32 lumigan.mp. (51)
- 42 33 travatan.mp. (63)
- 43 34 xalatan.mp. (137)
- 44 35 izba.mp. (7)
- 45 36 taflotan.mp. (5)
- 46 37 zioptan.mp. (1)

- 47 38 or/23-37 (15962)  
 48 39 22 and 38 (1967)  
 49 40 animals/ (5802956)  
 50 41 humans/ (15763478)  
 51 42 40 not 41 (4175932)  
 52 43 39 not 42 (1791)  
 53  
 54 Appendix 2. Data extraction form  
 55

|                                  |
|----------------------------------|
| Data Extraction                  |
| <b>Basic Information</b>         |
| Ref ID                           |
| First Author (Last Name)         |
| Year                             |
| Country                          |
| Study Design                     |
| 1=case study                     |
| 2=observational study            |
| 3=randomized trial               |
| Funding Source                   |
| 0=none                           |
| 1=industry                       |
| 2=not-for-profit                 |
| 3=n/a                            |
| <b>Key Information</b>           |
| <b>Group 1</b>                   |
| n at baseline                    |
| Mean Age                         |
| Median Age                       |
| Age range                        |
| SD of age                        |
| Disease studied                  |
| n of patient with previous<br>sx |
| PGA agent                        |
| n of uveitis                     |
| n of non-op CME                  |
| n of post-op CME                 |
| Other                            |
| <b>Group 2</b>                   |

|                                  |
|----------------------------------|
| n at baseline                    |
| Mean Age                         |
| Median Age                       |
| Age range                        |
| SD of age                        |
| Disease studied                  |
| n of patient with previous<br>sx |
| PGA agent                        |
| n of uveitis                     |
| n of non-op CME                  |
| n of post-op CME                 |
| Other                            |
| <b>Group 3</b>                   |
| n at baseline                    |
| Mean Age                         |
| Median Age                       |
| Age range                        |
| SD of age                        |
| Disease studied                  |
| n of patient with previous<br>sx |
| PGA agent                        |
| n of uveitis                     |
| n of non-op CME                  |
| n of post-op CME                 |
| Other                            |
| <b>Group 4</b>                   |
| n at baseline                    |
| Mean Age                         |
| Median Age                       |
| Age range                        |
| SD of age                        |
| Disease studied                  |
| n of patient with previous<br>sx |
| PGA agent                        |
| n of uveitis                     |
| n of non-op CME                  |

|                  |
|------------------|
| n of post-op CME |
| Other            |

56

57

## Appendix 3. Case study data extraction form

58

| Authors | Eyes/patients | History | Time to Uveitis/Postoperatively | Rechallenged/Recurred | Outcome |
|---------|---------------|---------|---------------------------------|-----------------------|---------|
|---------|---------------|---------|---------------------------------|-----------------------|---------|

59

60

## Appendix 4. Fisher Exact Test Calculated using Social Science Statistics Website comparing the proportion of uveitis among latanoprost and bimatoprost users

61

62

| Results                       |                 |                        |                     |
|-------------------------------|-----------------|------------------------|---------------------|
|                               | Develop uveitis | Do not develop uveitis | Marginal Row Totals |
| Latanoprost                   | 59              | 12651                  | 12710               |
| Bimatoprost                   | 1               | 6745                   | 6746                |
| <b>Marginal Column Totals</b> | 60              | 19396                  | 19456 (Grand Total) |

63

64

The Fisher exact test statistic value is  $< 0.00001$ . The result is significant at  $p < .05$ .

65

66

67

## Appendix 5. Fisher Exact Test Calculated using Social Science Statistics Website comparing the proportion of cystoid macular edema among latanoprost and bimatoprost users

68

69

| Results                       |             |                    |                     |
|-------------------------------|-------------|--------------------|---------------------|
|                               | Develop CME | Do not develop CME | Marginal Row Totals |
| Latanoprost                   | 23          | 12153              | 12176               |
| Bimatoprost                   | 0           | 6746               | 6746                |
| <b>Marginal Column Totals</b> | 23          | 18899              | 18922 (Grand Total) |

70

71

The Fisher exact test statistic value is 0.0001. The result is significant at  $p < .05$ .

72

73

74

## Appendix 6. Case Studies Summary for Cystoid Macular Edema among prostaglandin analogue users

75

| Authors          | Eyes/patients | Clinical history                                                           | Time to CME/postoperative                         | Re-challenged/Recurred                                | Outcome                                                                        |
|------------------|---------------|----------------------------------------------------------------------------|---------------------------------------------------|-------------------------------------------------------|--------------------------------------------------------------------------------|
| Rowe et al.*     | 1/1           | PCIOL, prior CME                                                           | 1 month/No                                        | No                                                    | DC alone                                                                       |
| Ayyala et al.*   | 6/4           | 4 PCIOL, 2 aphakic, 5 PCR, 1 intact capsule with prior CME and uveitis     | 7 days/10 days/10 days/14 days/30 days/30 days/No | Yes (2)/Yes when diclofenac and steroids discontinued | DC alone (4), (2) without DC but concurrent use of diclofenac, corticosteroids |
| Avakian et al.*  | 2/2           | 1. PCIOL with endoscopic cyclophotocoagulation<br>2. ACIOL with PCR and AV | 3 weeks/2 months/No                               | Yes (1)/Yes                                           | DC alone; with ketorolac on re-challenge                                       |
| Heier et al.*    | 1/1           | Sutured PCIOL, PK/IOL exchange from ACIOL, BK, PCR, AV                     | 3 weeks/No                                        | No                                                    | DC alone                                                                       |
| Callanan et al.* | 2/2           | 1. PCIOL with PCR                                                          | 7 weeks/4 months/No                               | Yes (1)/Yes                                           | DC with brimonidine,                                                           |

|                       |     |                                                                                                                                                                                                                                                                                                                                                                                     |                                                                    |                                                             |                                                                                              |
|-----------------------|-----|-------------------------------------------------------------------------------------------------------------------------------------------------------------------------------------------------------------------------------------------------------------------------------------------------------------------------------------------------------------------------------------|--------------------------------------------------------------------|-------------------------------------------------------------|----------------------------------------------------------------------------------------------|
|                       |     | 2. sutured PCIOL with PCR, radial keratotomy, AV, trab twice, avascular bleb                                                                                                                                                                                                                                                                                                        |                                                                    |                                                             | ketorolac and prednisolone                                                                   |
| Thorne et al.*        | 2/1 | 2 ACIOL                                                                                                                                                                                                                                                                                                                                                                             | 4 weeks (2)/No                                                     | Yes (1, twice)/No (twice)                                   | DC alone                                                                                     |
| Gaddie and Bennett*   | 2/2 | 1. PCIOL, PCR, ALT twice<br>2. ACIOL, yag, intermittent low grade AU, surgical iridotomy, vitreous macular traction, dipivefrin                                                                                                                                                                                                                                                     | 3 months/2 weeks/No                                                | No                                                          | DC alone (1), with discontinuation of dipivefrin and with ketorolac (1)                      |
| Moroi et al.*         | 7/7 | 1. Phakic, BRVO, ERM, prior CME, dipivefrin<br>2. PCIOL, Acute AU, ERM, trab, ALT, Ahmed<br>3. Subluxed lens, Marfan syndrome, HLA-B27 associated uveitis, thermal sclerostomy, bleb revision, AV<br>4. PCIOL, yag, ERM, ALT, posterior lip sclerectomy, PPV, MP<br>5. PCIOL, yag, dipivefrin-associated CME<br>6. PCIOL, yag, ERM<br>7. PCIOL, PCR, PPV for retained lens fragment | 1 month/1 month/1.5 months/2 months/2 months/7 months/11 months/No | No                                                          | DC alone (4), with ketorolac and prednisolone (2), with rimexolone, prednisone, cyclogel (1) |
| Schumer et al.*       | 1/1 | ACIOL, PCR, AV, RD treated with cryotherapy and scleral buckle, ALT, trab, CME                                                                                                                                                                                                                                                                                                      | 1 month/No                                                         | No                                                          | DC with diclofenac and prednisolone                                                          |
| Wand and Gaudio+~     | 3/3 | 1. PCIOL, PCR, trab, 1 wk postop endophthalmitis, PPV and intravitreal abx                                                                                                                                                                                                                                                                                                          | 2 weeks/4 months/1 year/No                                         | Yes (1, on anti-inflammatories)/No (on anti-inflammatories) | DC with ketorolac (3), with dexamethasone (2)                                                |
| Altintas et al.*      | 2/2 | 2 PCIOL, 1 PCR                                                                                                                                                                                                                                                                                                                                                                      | 10 days/1 month/Yes                                                | No                                                          | DC with ketorolac, acetazolamide                                                             |
| Brasil et al.*        | 4/2 | 4 PCIOL, 4 yag                                                                                                                                                                                                                                                                                                                                                                      | 1 month (2) /3 months (2)/No                                       | No                                                          | DC alone (2), with dorzolamide, timolol (2)                                                  |
| Carrillo et al.=      | 1/1 | PCIOL, ALT twice                                                                                                                                                                                                                                                                                                                                                                    | 9 months/Yes                                                       | No                                                          | DC with diclofenac                                                                           |
| Esquenazi~            | 1/1 | PCIOL, dry eyes, corneal anterior basement membrane dystrophy, ALT                                                                                                                                                                                                                                                                                                                  | 3 weeks/No                                                         | No                                                          | DC with brimonidine, topical steroids, nonsteroidals                                         |
| Halpern and Pasquale* | 1/1 | PCIOL, yag, trab, Crohn's, chronic lymphocytic leukemia                                                                                                                                                                                                                                                                                                                             | 5 months/No                                                        | No                                                          | DC with ketorolac                                                                            |
| Tokunaga et al.*      | 1/1 | PCIOL, PPV                                                                                                                                                                                                                                                                                                                                                                          | 2 months/No                                                        | No                                                          | DC with fluorometholone, indomethacin                                                        |
| Dhingra et al.*       | 1/1 | PCIOL                                                                                                                                                                                                                                                                                                                                                                               | 3 months/Yes                                                       | Yes (after trab, needling)/Yes                              | DC with sub-tenon's triamcicolone                                                            |

|                                            |                      |                                                                    |                                                     |                                                      |                                                                                                 |
|--------------------------------------------|----------------------|--------------------------------------------------------------------|-----------------------------------------------------|------------------------------------------------------|-------------------------------------------------------------------------------------------------|
| Agange*                                    | 2/1                  | 2 PCIOL                                                            | 4 months (2)/Yes                                    | Yes (twice, but with bimatoprost and travoprost)/Yes | DC with diclofenac                                                                              |
| Ozdemir et al.*                            | 2/2                  | 2 PCIOL, 1 extracapsular extraction, 1 PCR, 1 AV                   | 2 weeks/1 month/No                                  | No                                                   | DC alone                                                                                        |
| Sacchi et al.!                             | 1/1                  | PCIOL                                                              | 2 months/Yes                                        | No                                                   | DC with topical nepafenac and oral indomethacin, subtenon's, dexamethasone intravitreal implant |
| Makri et al.*                              | 1/1                  | PCIOL OD                                                           | 7 months/post op 19 months for cataract             | No                                                   | DC with topical nepafenac, replace with brinzolamide                                            |
| 21 studies<br>17*<br>1+~<br>1=<br>1~<br>1! | 48 eyes /43 patients | 47 Pseudophakic/aphakic/subluxated<br>47 incisional ocular surgery | Median 30 days (range 7-365)<br>only 10 eyes postop | 8 eyes re-challenged, 1 eye did not recur twice      | All cases were reversible.                                                                      |

76 \*latanoprost; + unoprostone; = bimatoprost; ~ travoprost; ! tafluprost; Ahmed, Ahmed glaucoma valve; ALT, argon laser trabeculoplasty; AU, anterior uveitis; AV, anterior vitrectomy; BK, bullous keratopathy; BRVO, branch retinal vein occlusion; CME, cystoid macular edema; DC, resolved with discontinuation of drug; ERM, epiretinal membrane; HRVO, hemi-retinal vein occlusion; IOL, intraocular lens; MP, membrane peel; PCIOL, posterior chamber intraocular lens; PCR, posterior capsule rupture; PK, penetrating keratoplasty; PPV, pars planas vitrectomy; RD, retinal detachment; trab, trabeculectomy; yag, yag laser capsulotomy

81

## 82 Appendix 7. Summary of case studies reporting uveitis after prostaglandin analogue use

| Authors          | Eyes/patients | History                                                                                                                                                                                                                                                                                                                                  | Time to Uveitis/Postoperatively      | Rechallenged/Recurred | Outcome                                       |
|------------------|---------------|------------------------------------------------------------------------------------------------------------------------------------------------------------------------------------------------------------------------------------------------------------------------------------------------------------------------------------------|--------------------------------------|-----------------------|-----------------------------------------------|
| Faulkner~        | 2/1           | 1. 1 aphakic with RD repair<br>2. PCIOL, 2 mild corneal guttata                                                                                                                                                                                                                                                                          | 5 days (2)/No                        | No                    | DC with loteprednol                           |
| Fechtner et al.* | 5/4           | 1. Sutured PCIOL, intraoperative suprachoroidal hemorrhage, trab, bleb leak revision, repeat trab, AV<br>2. 1 PCIOL, 1 phakic with amblyopia, retinal macroaneurysm focal laser photocoagulation<br>3. traumatic glaucoma (pupillary sphincter tear, an eccentric pupil, and angle recession) and superiorly subluxed lens (with limited | 3 weeks/4 days (2) /1 day/13 days/No | Yes (5)/Yes           | DC with prednisolone (4), with rimexolone (1) |

|                             |       |                                                                                  |                                                       |                             |                       |
|-----------------------------|-------|----------------------------------------------------------------------------------|-------------------------------------------------------|-----------------------------|-----------------------|
|                             |       | vitreous prolapse), single episode of iritis in the other eye<br>4. aphakic, yag |                                                       |                             |                       |
| Kumarasamy and Desai~       | 1/1   | PCIOL, trab                                                                      | 3 weeks/No, but started 2 weeks postoperatively       | Yes/Yes                     | DC alone              |
| Packer et al.=              | 2/1   | None                                                                             | 1 day (2)/No                                          | No                          | DC with loteprednol   |
| Parentin=                   | 1/1   | Laser trabeculoplasty                                                            | 1 week/No                                             | No                          | DC alone              |
| Suominen and Valimaki~      | 2/1   | Bilateral laser trabeculoplasty                                                  | 1 week (2) No                                         | No                          | DC with dexamethasone |
| Waheed and Laganowski*      | 2/1   | None                                                                             | 2 months (2) /No                                      | No                          | DC alone              |
| 7 studies<br>2*<br>3~<br>2= | 15/10 | 8 pseudophakic/aphakic/subluxed<br>7 with incisional surgery                     | Median 6 days (range 1-61)<br>0 cases postoperatively | 6 re-challenged, 6 recurred | All were reversible   |

83 \*latanoprost; = bimatoprost; ~ travoprost; AV, anterior vitrectomy; DC, resolved with discontinuation of drug; PCIOL, posterior chamber  
84 intraocular lens; trab, trabeculectomy; yag, yag laser capsulotomy

85

86
